# Supplementary material
Source: HighWire-hosted journal article supplement (https://www.ijssurgery.com/content/8301)
Supplement: inline-supplementary-material-2 [file inline-supplementary-material-2.docx]

**Supplemental Table 2.** ICD9 Diagnostic Codes Utilized to Access Perioperative Complications

| **Complication** | **ICD9 Code** |
| --- | --- |
| **Pseudarthrosis** | *733.82* |
| **Revision Surgery** | *813.6, 813.7, 813.8* |
